# Supplementary material for: Dynamic regulation of mitotic ubiquitin ligase APC/C by coordinated Plx1 kinase and PP2A phosphatase action on a flexible Apc1 loop
Source: PubMed Central journal article supplement (PMC8441438; doi:10.15252/embj.2020107516), 2021-07-22
Supplement: EMBJ-40-e107516-s003.pdf [file EMBJ-40-e107516-s003.pdf]

## Expanded View Figures

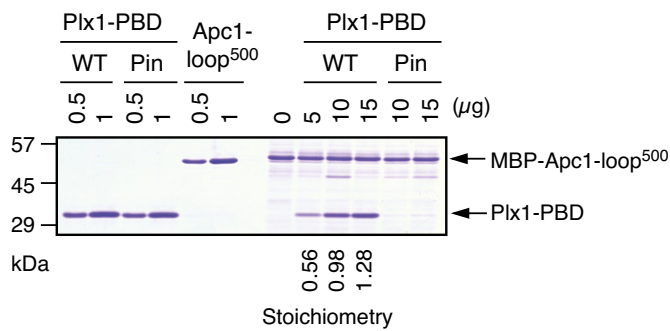

**Figure EV1. Plx1-PBD, not its Pincer mutant, binds Apc1-loop<sup>500</sup>.**  
Apc1-loop<sup>500</sup> binding assay to Plx1-PBD. See Fig 1F for the details.

**Figure EV2. Destruction assays using mutant APC/Cs (1-2A and 1-S558A).**

- A Cdc20-dependent destruction assay in anaphase. The purified recombinant WT APC/C or its derivatives (1-2A and 1-S558A) was incubated with its substrates (<sup>35</sup>S-labelled cyclin B and a version of cyclin B lacking the N-terminal 67 residues, Δ67) in APC/C-depleted (ΔAPC) interphase extracts supplemented with non-degradable cyclin B at 23°C. Samples taken at indicated time points were analysed by SDS-PAGE and autoradiography.
- B Quantification of (A). The relative cyclin levels are shown, normalised with reference to the intensities found at time 0 for each time point. Error bars, SEM from three independent experiments.
- C Cdh1-dependent destruction assay. The purified recombinant WT APC/C or its derivatives (1-2A and 1-S558A) was incubated with its substrates in APC/C-depleted (ΔAPC) interphase extracts supplemented with Cdh1 at 23°C. Samples taken at indicated time points were analysed by SDS-PAGE and autoradiography.
- D Quantification of (C). The relative cyclin levels are shown, normalised with reference to the intensities found at time 0 for each time point. Error bars, SEM from three independent experiments.

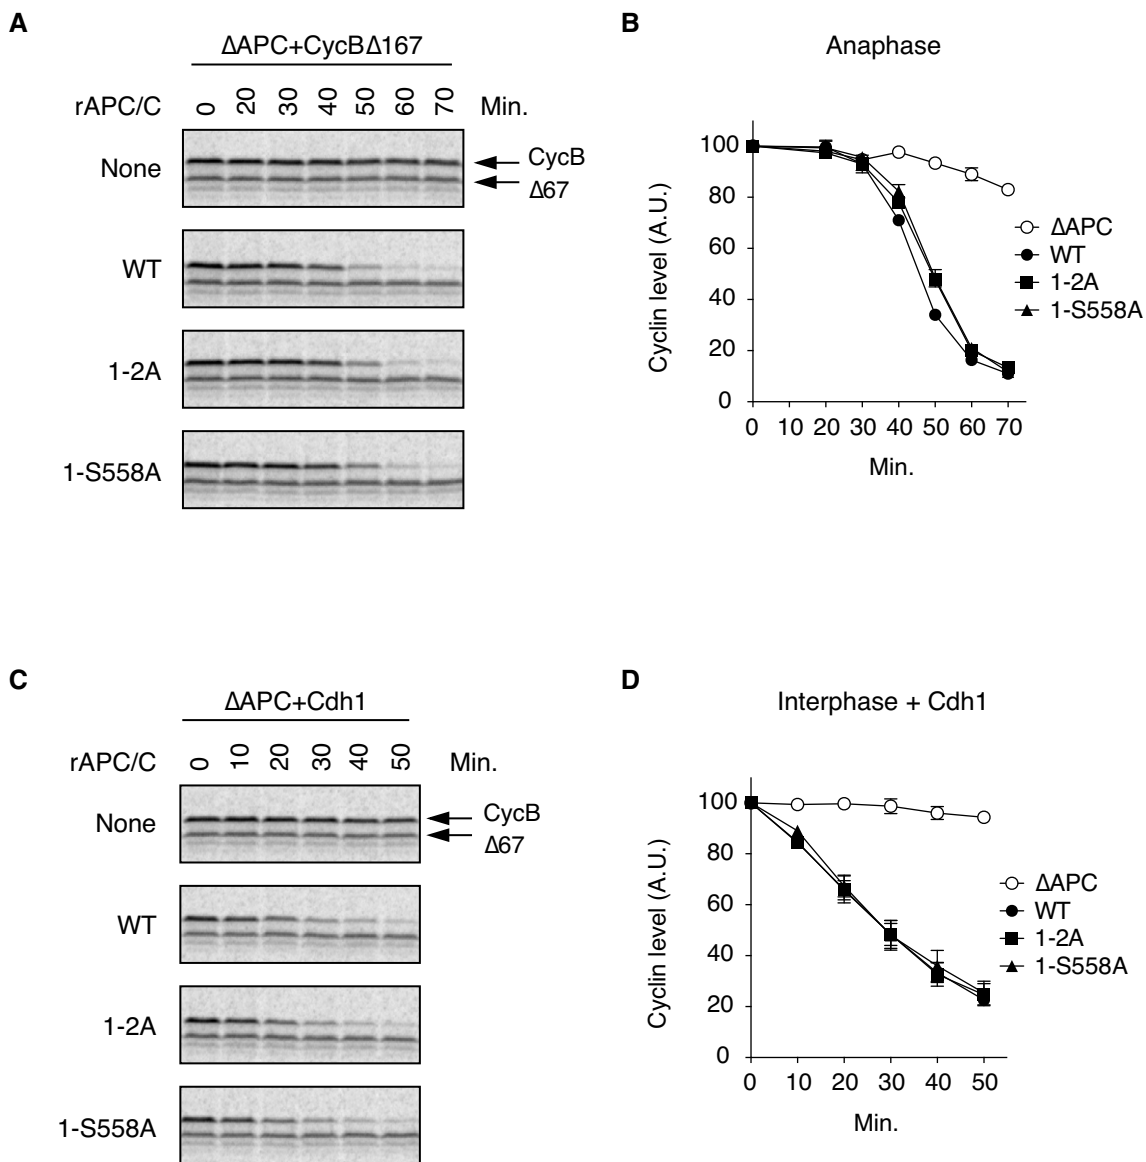

Figure EV2.



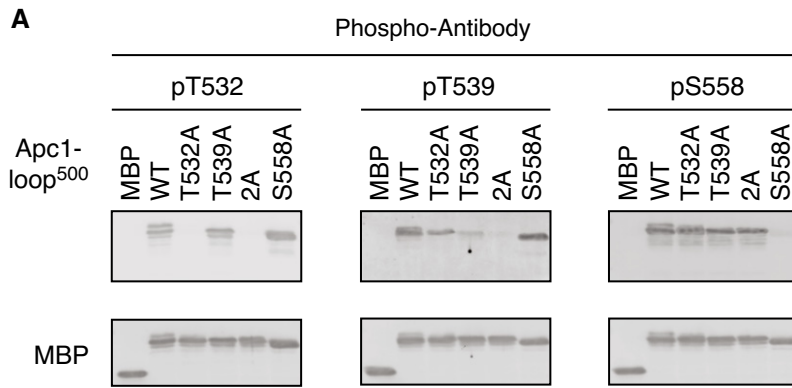

**Figure EV4. Specificities of phospho-specific antibodies.**

A MBP-fused Apc1-loop<sup>500</sup> WT or its derivatives (T532A, T539A, 2A and S558A) was incubated with anaphase extracts supplemented with non-degradable cyclin B at 23°C for 1 h. The bound proteins were recovered by amylose beads, separated by SDS-PAGE and detected by immunoblotting with a phospho-specific antibody (pT532, pT539 or pS558) and MBP antibody.

B Phospho-specific antibodies recognise CDK sites of Apc1-loop<sup>500</sup> phosphorylated by Cdk2/cyclin A *in vitro*. MBP-fused Apc1-loop<sup>500</sup> WT and its derivatives (T532A, T539A, 2A and S558A) recovered in Appendix Fig S2 were analysed as described in A.

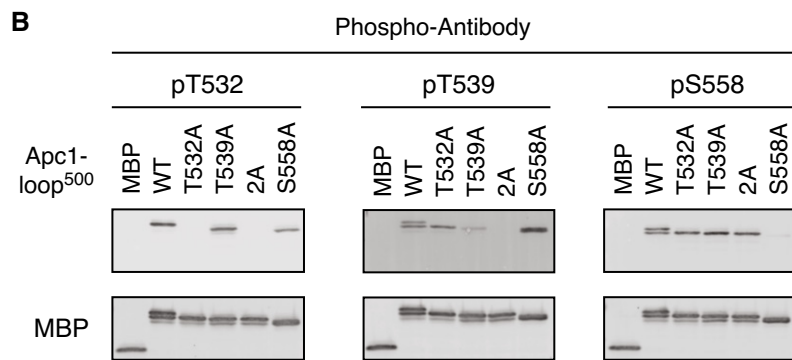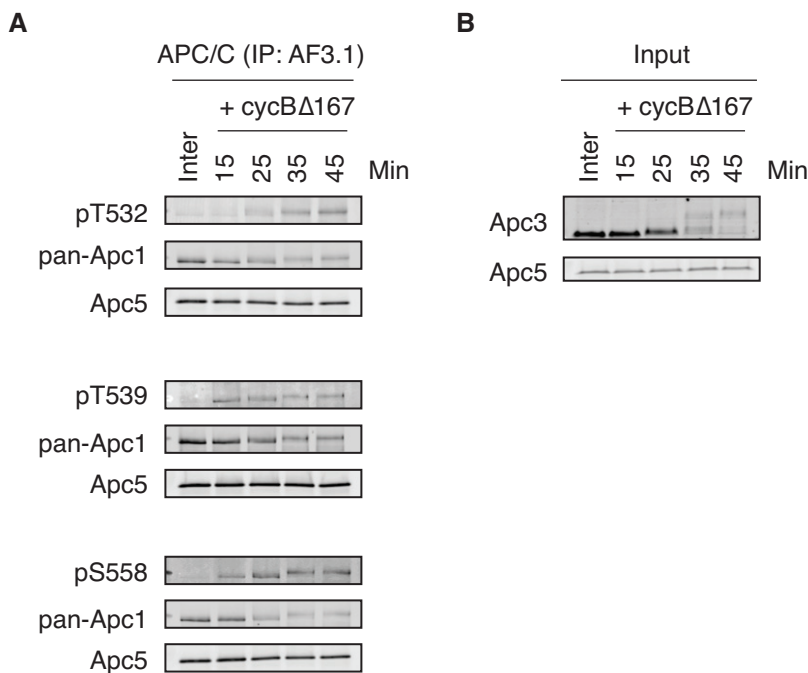

**Figure EV5. Phosphorylation kinetics of T532, T539 and S558 on Apc1-loop<sup>500</sup> of the endogenous APC/C in *Xenopus* egg extracts.**

A Endogenous APC/C was immunoprecipitated with Apc3 monoclonal antibody (AF3.1) beads after incubation at 23°C for the indicated time points after mitotic induction by adding non-degradable cyclin BΔ167. The bound proteins were analysed by SDS-PAGE and immunoblotting with indicated antibodies. See Fig 5C for quantification. "Inter" denotes interphase.

B Monitoring of mitotic induction from interphase extract upon cyclin B addition. When Cdk1 becomes active, Apc3 is hyper-phosphorylated, as observed with the band shifts of Apc3. Samples were taken at the indicated times and analysed by SDS-PAGE and immunoblotting with indicated antibodies.
